# Supplementary material for: Clinicopathological Features of Gastric Cancer with Autoimmune Gastritis
Source: MDPI journal article supplement (doi:10.3390/biomedicines10040884), 2022-04-12
Supplement: s1 [file s1]

**Supplementary Table 1. Patient characteristics of medications**

| Characteristic                        | APCA-positive<br>(n = 76) | APCA-negative<br>(n = 185) | <i>P</i> value |
|---------------------------------------|---------------------------|----------------------------|----------------|
| Medications                           |                           |                            |                |
| Aspirin                               | 8 (10.53)                 | 19 (10.27)                 | 0.951          |
| Proton pump inhibitors                | 38 (50.00)                | 78 (42.16)                 | 0.247          |
| Histamine-2 receptor blocker          | 20 (26.32)                | 30 (16.22)                 | 0.060          |
| Statin                                | 12 (15.79)                | 25 (13.51)                 | 0.632          |
| Nonsteroidal anti-inflammatory drugs  | 13 (17.11)                | 27 (14.59)                 | 0.609          |
| Angiotensin-converting enzyme blocker | 8 (10.53)                 | 17 (9.19)                  | 0.739          |
| Angiotensin II receptor blocker       | 17 (22.37)                | 36 (19.46)                 | 0.596          |
| $\alpha$ blocker                      | 1 (1.32)                  | 6 (3.24)                   | 0.677          |
| $\beta$ blocker                       | 10 (13.16)                | 21 (11.35)                 | 0.682          |
| Vitamin B12                           | 13 (17.11)                | 22 (11.89)                 | 0.262          |
| Vitamin C                             | 5 (6.58)                  | 9 (4.86)                   | 0.577          |
| Metformin                             | 3 (3.95)                  | 8 (4.32)                   | 0.891          |
